# Supplementary material for: Risk of out-of-hospital cardiac arrest in patients with rheumatoid arthritis: a nationwide study
Source: PubMed Central journal article supplement — Open Heart. 2022 Jun 1;9(1):e001987. doi: 10.1136/openhrt-2022-001987 (PMC9161077; doi:10.1136/openhrt-2022-001987), 2022-06-01
Supplement: openhrt-2022-001987supp001.pdf [file openhrt-2022-001987supp001.pdf]

# Supplementary material

**Supplementary Table 1. ICD-10 codes, procedure and ATC codes for covariate definitions**

| <b>Disease</b>                                                                                                                                                     | <b>ICD-10 codes</b>                                          | <b>Procedure codes</b>                                 | <b>ATC codes</b>                                                                                                                                                                                                                      |
|--------------------------------------------------------------------------------------------------------------------------------------------------------------------|--------------------------------------------------------------|--------------------------------------------------------|---------------------------------------------------------------------------------------------------------------------------------------------------------------------------------------------------------------------------------------|
| Rheumatoid arthritis                                                                                                                                               | M05, M06, M08                                                |                                                        |                                                                                                                                                                                                                                       |
| Ischemic heart disease†                                                                                                                                            | I20-I25                                                      | KFNA, KFNB, KFNC, KFND,<br>KFNE, KFNG, KFNF,<br>KFNH20 |                                                                                                                                                                                                                                       |
| Heart failure                                                                                                                                                      | I50, I110, I130, I132, I420, I426-<br>I429, I421, I422, I425 |                                                        |                                                                                                                                                                                                                                       |
| Atrial fibrillation                                                                                                                                                | I48                                                          |                                                        |                                                                                                                                                                                                                                       |
| Diabetes mellitus                                                                                                                                                  |                                                              |                                                        | A10                                                                                                                                                                                                                                   |
| Cerebrovascular disease                                                                                                                                            | I60-I69, G45-G46                                             |                                                        |                                                                                                                                                                                                                                       |
| Peripheral artery disease                                                                                                                                          | I70-I74, I77                                                 |                                                        |                                                                                                                                                                                                                                       |
| <b>Concomitant pharmacotherapy</b>                                                                                                                                 |                                                              |                                                        |                                                                                                                                                                                                                                       |
| Beta blockers                                                                                                                                                      |                                                              |                                                        | C07                                                                                                                                                                                                                                   |
| Calcium channel blockers                                                                                                                                           |                                                              |                                                        | C08                                                                                                                                                                                                                                   |
| Antithrombotics                                                                                                                                                    |                                                              |                                                        | B01AA, B01AC, B01AE07, B01AF01,<br>B01AF02, B01AF03                                                                                                                                                                                   |
| Diuretics                                                                                                                                                          |                                                              |                                                        | C03AA, C03AB, C03B, C03C, C03D, C03E,<br>C07B, C07CA, C07CB, C07D, C08G, C09BA,<br>C09DA                                                                                                                                              |
| Renin-angiotensin system inhibitors                                                                                                                                |                                                              |                                                        | C09A, C09B, C09C, C09D                                                                                                                                                                                                                |
| Nitrates                                                                                                                                                           |                                                              |                                                        | C01DA                                                                                                                                                                                                                                 |
| Antiarrhythmic drugs class 1 or 3                                                                                                                                  |                                                              |                                                        | C01B                                                                                                                                                                                                                                  |
| QT-prolonging drugs††                                                                                                                                              |                                                              |                                                        | J01FA06, J01FA10, J01MA02, J01FA09,<br>J01FA01, J01MA14, J02AC01, N05AA02,<br>N05AL01, C07AA07, C01BA01, N05AG02,<br>A04AA01, N05AD01, C01BC04, N06AB10,<br>C01BD07, N06DA02, A03FA03, N06AB04,<br>N05AD08, N05AA01, N05AF03, C01BD01 |
| † Including acute myocardial infarction                                                                                                                            |                                                              |                                                        |                                                                                                                                                                                                                                       |
| †† QT-prolonging drugs with known risk of Torsade de Pointes according to CredibleMeds website ( <a href="http://www.CredibleMeds.org">www.CredibleMeds.org</a> ). |                                                              |                                                        |                                                                                                                                                                                                                                       |

**Supplementary Table 2. ATC codes of NSAIDs**

| <b>NSAID</b> | <b>ATC codes</b> |
|--------------|------------------|
| Any nsaid    | M01A             |
| Diclofenac   | M01AB05          |
| Ibuprofen    | M01AE01          |
| Naproxen     | M01AE02          |
| Celecoxib    | M01AH01          |
| Rofecoxib    | M01AH02          |
